# Supplementary material for: Gender-Dependent Phenotype in Polycystic Kidney Disease Is Determined by Differential Intracellular Ca2+ Signals
Source: MDPI journal article supplement (doi:10.3390/ijms22116019), 2021-06-02
Supplement: s1 [file s1]

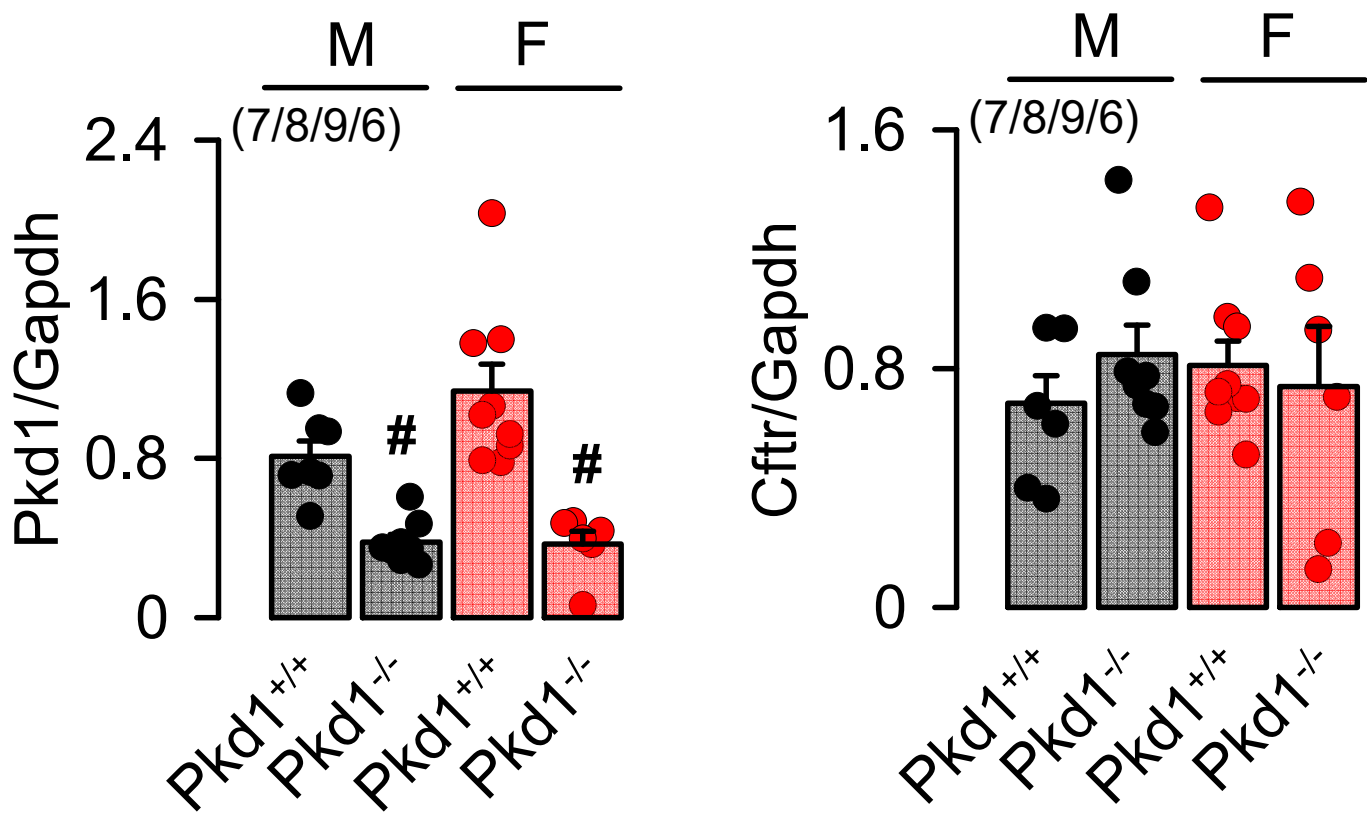

**Supplementary Figure S1.** *CFTR* mRNA expression in primary renal epithelial cells. Semiquantitative RT-PCR analysis of *CFTR* mRNA expression in primary medullary renal epithelial cells from male (M) and female (F) Pkd1<sup>+/+</sup> and Pkd1<sup>-/-</sup> mice. Mean ± SEM (number of animals). # indicates significant knockdown of Pkd1 (p<0.05; unpaired t-test).

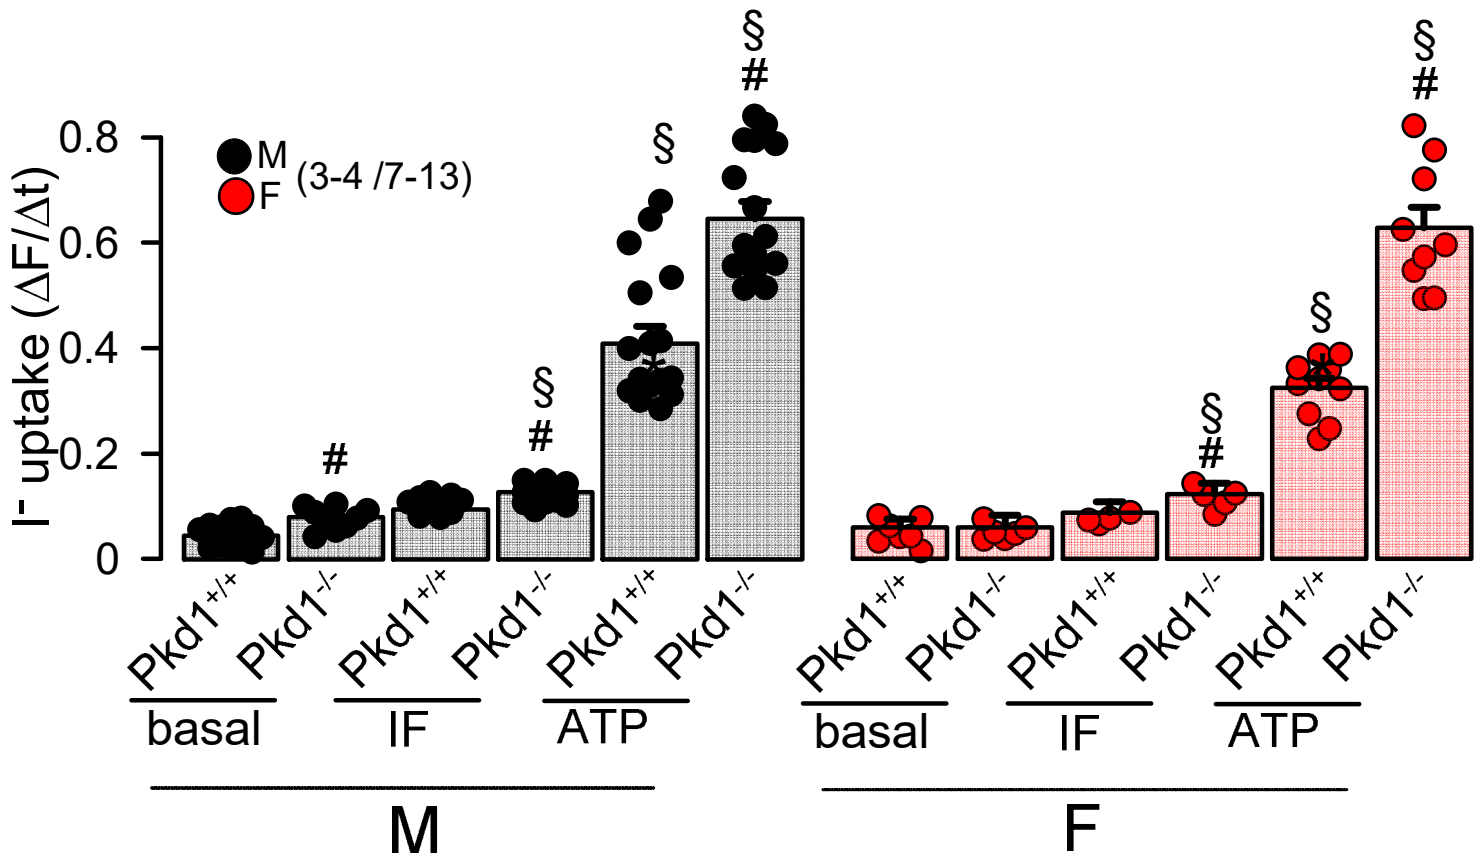

**Supplementary Figure S2.** *YFP-quenching to assess anion permeability.* Summaries of single cell yellow fluorescence protein (YFP) iodide quenching ( $I^-$  uptake) experiments in primary renal epithelial cells from male and female Pkd1<sup>+/+</sup> and Pkd1<sup>-/-</sup> mice.  $I^-$  uptake was assessed under basal conditions and after stimulation with IF (100  $\mu$ M/2  $\mu$ M) or ATP (50  $\mu$ M). Mean  $\pm$  SEM (number of animals/number of experiments in each series). #significant difference compared to Pkd1<sup>+/+</sup> ( $p < 0.05$ ; unpaired t-test). §significant difference compared to basal ( $p < 0.05$ ; ANOVA and Tukey's post-hoc test).

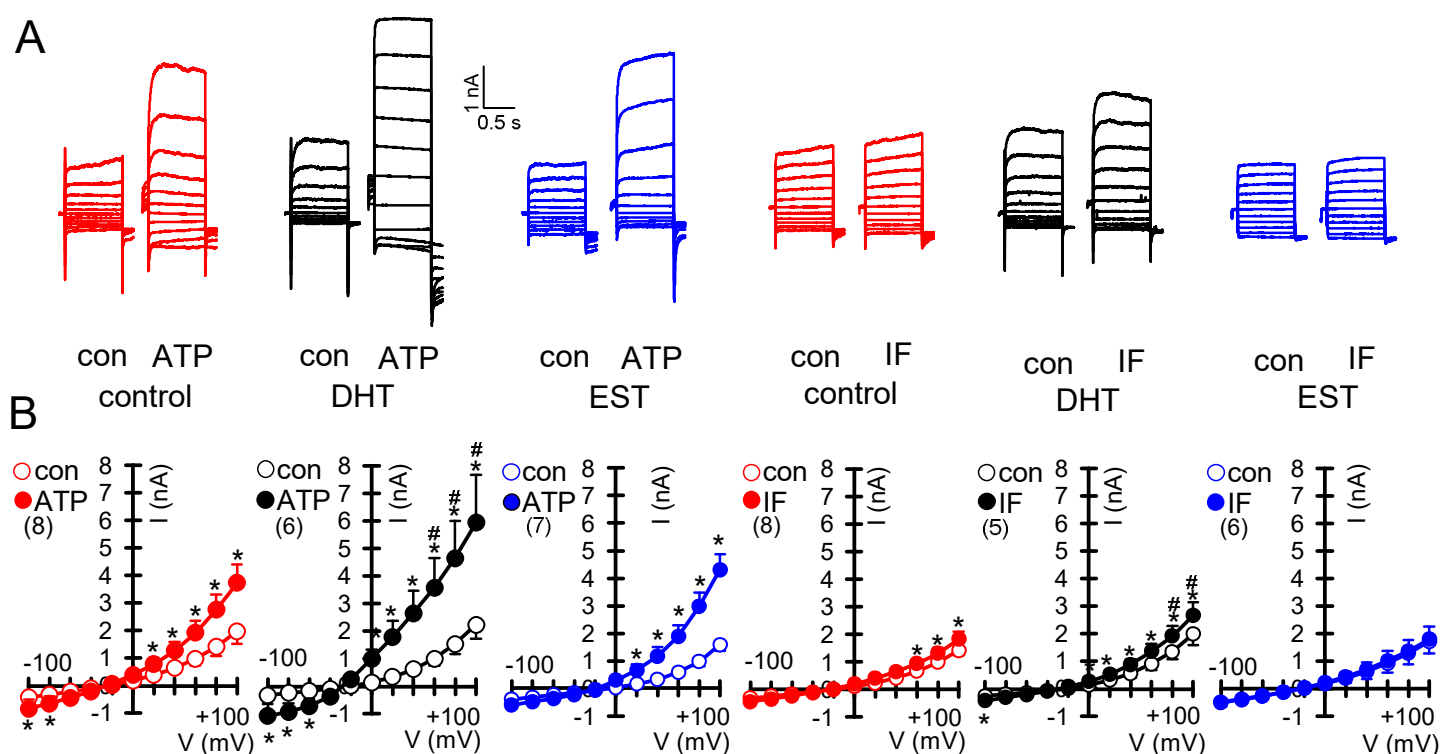

**Supplementary Figure S3. Ion currents in M1 mouse collecting duct cells.** A) Overlay currents for ATP (100  $\mu$ M) and IBMX/forskolin (IF; 100  $\mu$ M/2  $\mu$ M) - activated whole cell currents in untreated cells (control) and cells treated with dihydrotestosterone (DHT; 10  $\mu$ M, 24 hrs) or estrogen (EST; 10  $\mu$ M, 24 hrs). B) Summary current / voltage relationships corresponding to overlay currents shown in A (mean  $\pm$  SEM in A; Mean  $\pm$  SEM in B). \*significant increase by ATP or IF ( $p < 0.05$ ; paired t-test). #significant difference compared to control ( $p < 0.05$ ; ANOVA and Tukey's post-hoc test).

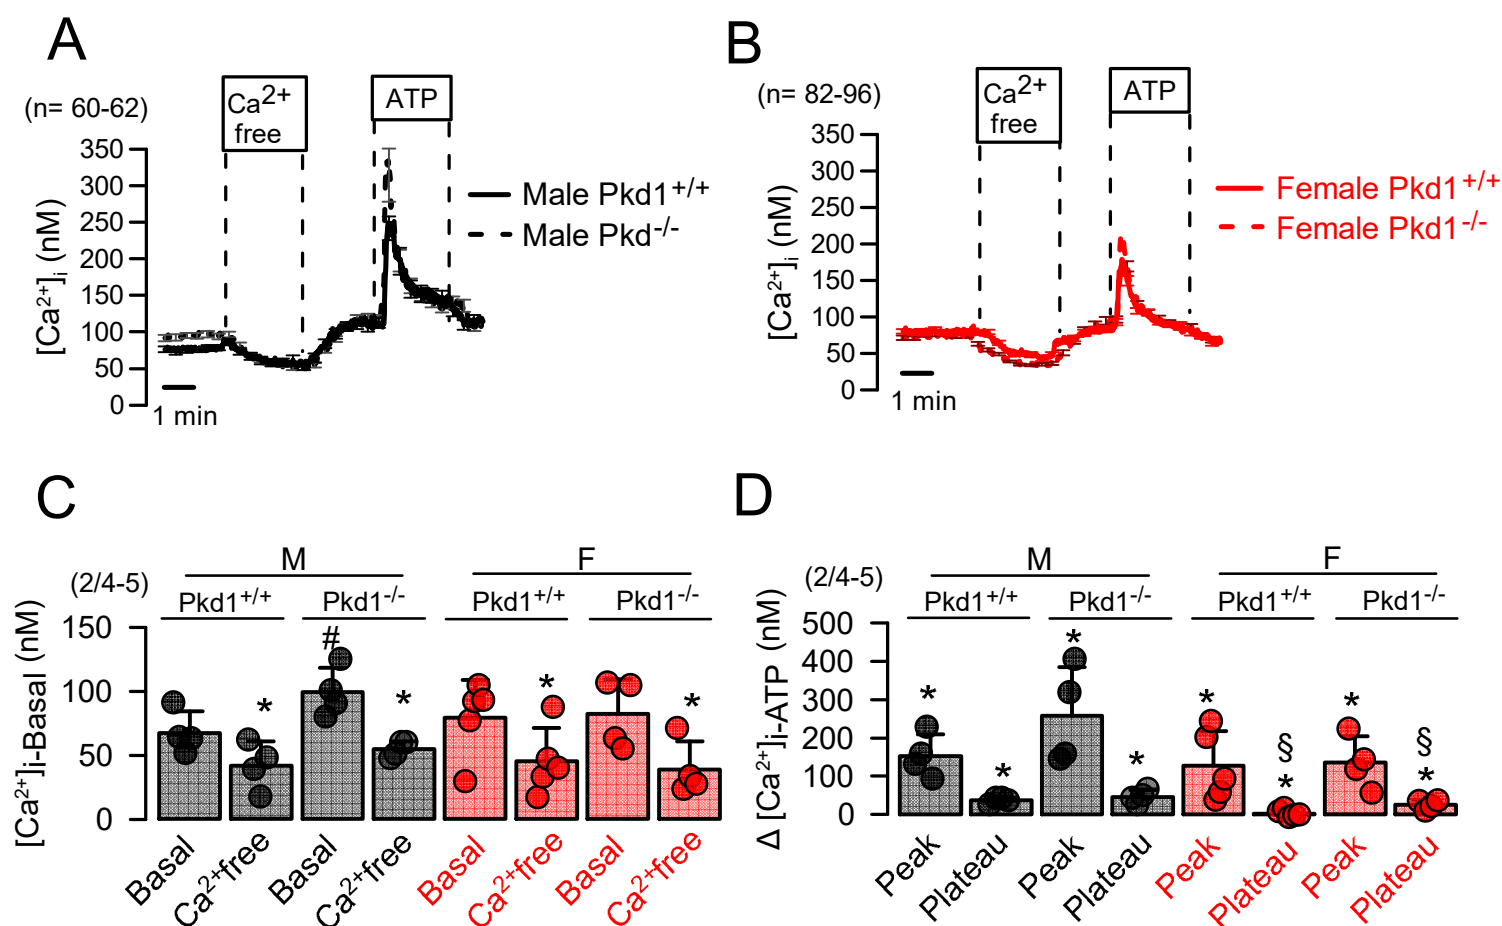

**Supplementary Figure S4.** Basal and ATP-induced intracellular  $\text{Ca}^{2+}$  in primary renal epithelial cells. A,B) Summary time course for basal and ATP (100  $\mu$ M) -induced intracellular  $\text{Ca}^{2+}$  concentrations in male (A) and female (B) Pkd1<sup>+/+</sup> and Pkd1<sup>-/-</sup> mice. C,D) Summary of basal (C) and ATP-induced (D) intracellular  $\text{Ca}^{2+}$  concentrations in male and female PKD1<sup>+/+</sup> and PKD1<sup>-/-</sup> mice. Mean  $\pm$  SEM (number of experiments). \*significant effect by extracellular  $\text{Ca}^{2+}$  free and ATP ( $p < 0.05$ ; paired t-test). #significant difference compared to Pkd1<sup>+/+</sup> ( $p < 0.05$ ; ANOVA). §significant difference compared to male ( $p < 0.05$ ; ANOVA).

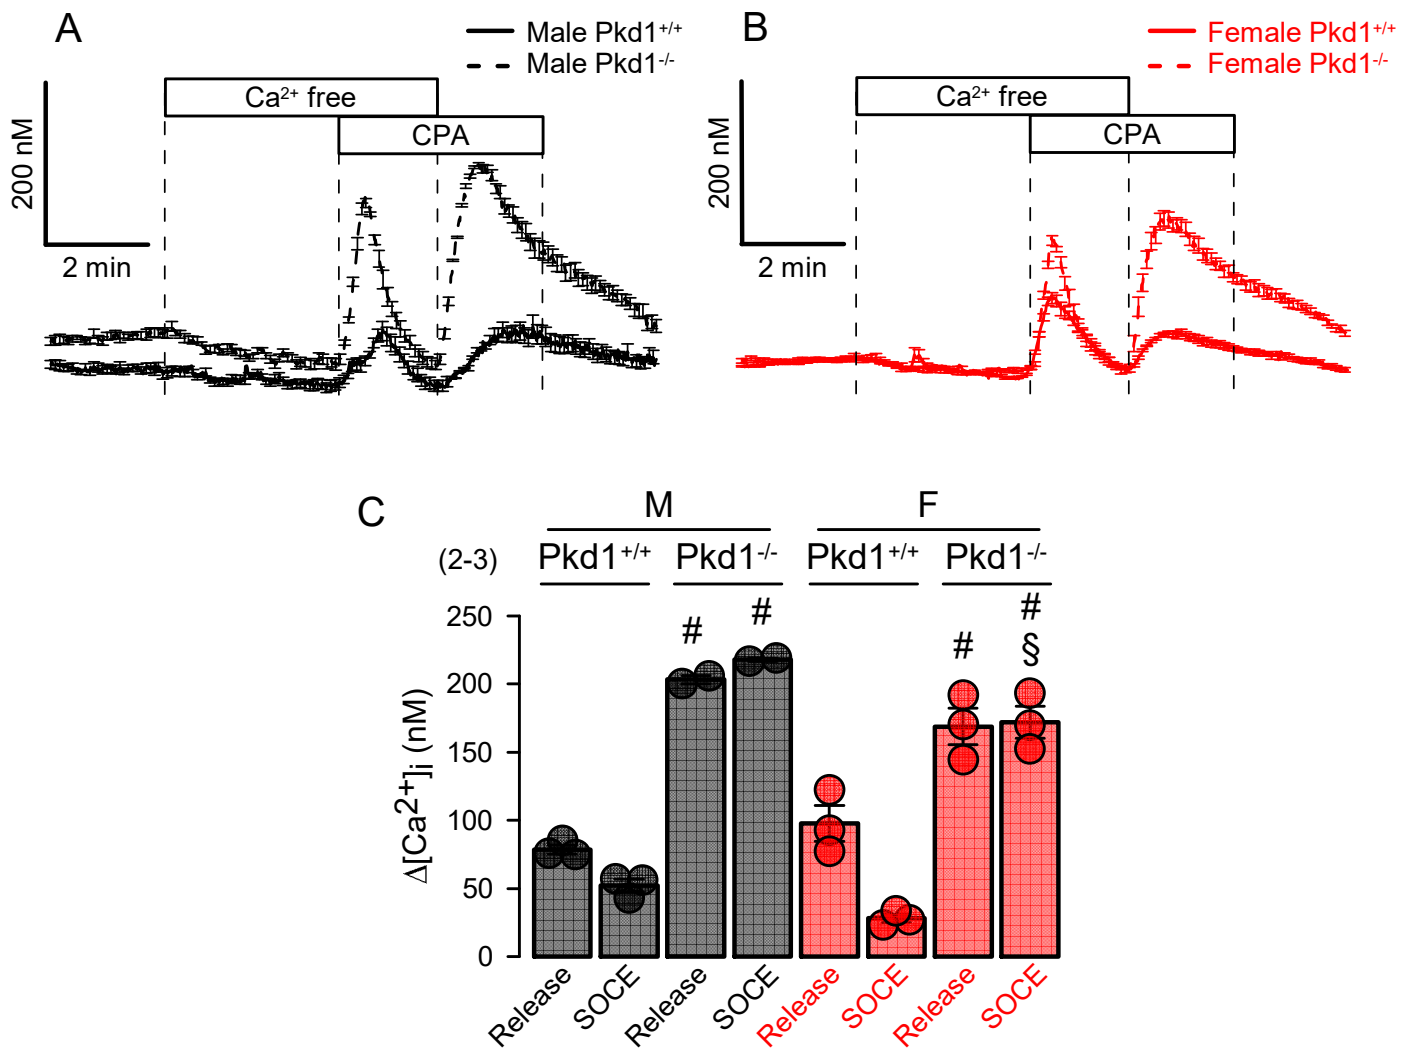

**Supplementary Figure S5.** CPA-induced store release in male and female primary renal epithelial cells. CPA-induced Ca<sup>2+</sup> store release in primary renal epithelial cells from male (A) and female (B) Pkd1<sup>+/+</sup> and Pkd1<sup>-/-</sup> mice. C) Summary of store release Ca<sup>2+</sup> and store operated Ca<sup>2+</sup> entry (SOCE) shown in A and B. Mean  $\pm$  SEM (number of experiments). #significant difference when compared to Pkd1<sup>+/+</sup> (p<0.05; unpaired t-test). §significant difference compared to male (p<0.05; ANOVA and Tukey's post-hoc test).
